# Supplementary material for: Impact of blood glucose on cognitive function in insulin resistance: novel insights from ambulatory assessment
Source: PubMed Central journal article supplement (PMC11390747; doi:10.1038/s41387-024-00331-0), 2024-09-11
Supplement: 41387_2024_331_MOESM1_ESM.pdf [file 41387_2024_331_MOESM1_ESM.pdf]

## Supplementary Materials

### To: Impact of Blood Glucose on Cognitive Function in Insulin Resistance: Novel Insights from Ambulatory Assessment

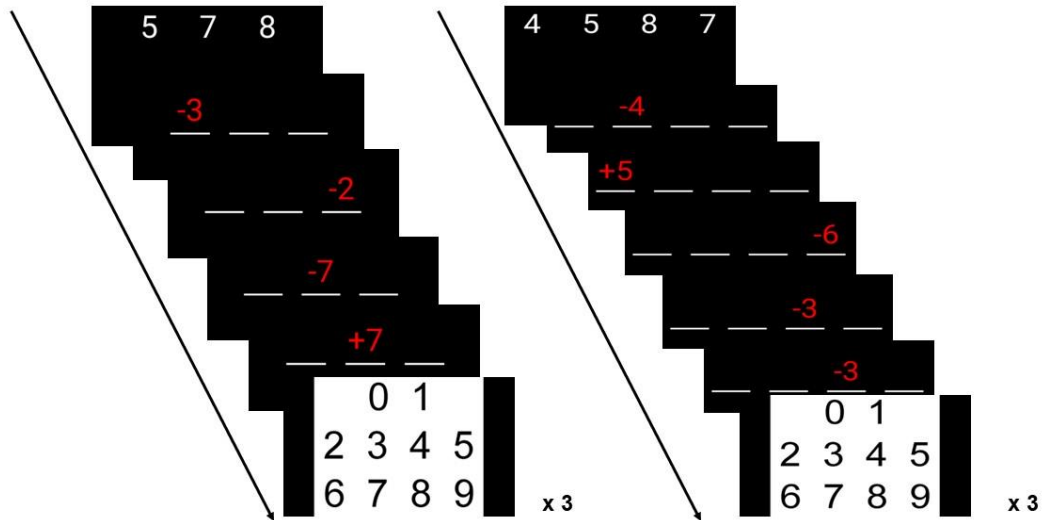

**Supplemental Figure S1 – Sequence of working memory tasks during EMA.** The WM task consisted of 2 parts: 1.) 3 runs with 3 digits and 2.) 3 runs with 4 digits. After memorizing the sequence (first row), individuals were presented with alternating addition or subtraction tasks below a given digit position. After 4 (5) operations, they selected the resulting digit sequence from a range of 0 to 9 (last row), taking care that the digits did not fall below 0 or above 9. This procedure was performed 3 times for each sequence length.

**Supplemental Table S1 – Cognitive assessment at baseline of the total study population and for the insulin-sensitive and insulin-resistant groups separately**

|                                      | All<br>(N = 110)      | Insulin-sensitive<br>(n = 57) | Insulin-resistant<br>(n = 53) | P<br>value <sup>a</sup> |
|--------------------------------------|-----------------------|-------------------------------|-------------------------------|-------------------------|
| MMSE, n                              | 30 [29-30]            | 30 [29-30]                    | 29 [29-30]                    | 0.022                   |
| Rey-Complex<br>Figure Test           | 125 [100-152]         | 137.5 [100-156]               | 119 [97-136]                  | 0.069                   |
| Digit Span, n                        |                       |                               |                               |                         |
| Forward                              | 8 [7-10]              | 8 [7-10]                      | 8 [7-10]                      | 0.405                   |
| Backward                             | 7 [6-8]               | 7 [6-9]                       | 6 [6-8]                       | 0.055                   |
| Block Span, n                        |                       |                               |                               |                         |
| Forward                              | 9 [8-10]              | 10 [8-11]                     | 9 [8-10]                      | 0.034                   |
| Backward                             | 9 [8-10]              | 10 [8-11]                     | 8 [7-10]                      | 0.001                   |
| Letter-Number-<br>Span, n            | 21 [19-23]            | 21 [20-24]                    | 20 [18-22]                    | 0.011                   |
| Verbal Fluency, n                    |                       |                               |                               |                         |
| Letter “S”,                          | 21.5 [18-26]          | 23 [19-29]                    | 20 [16-24]                    | 0.040                   |
| Animals                              | 38 [33-42]            | 38 [33-43]                    | 37 [33-42]                    | 0.353                   |
| Trail Making-Test, s                 |                       |                               |                               |                         |
| A                                    | 26.85 [21.81-34.14]   | 25.53 [19.33-31.36]           | 30.19 [24.8-38.05]            | 0.007                   |
| B                                    | 59.61 [47.54-83]      | 54 [43.61-65]                 | 73 [53.08-88.58]              | 0.002                   |
| Cognitive domains                    |                       |                               |                               |                         |
| Global<br>cognition <sup>b,c</sup>   | 0.034 [-0.471-0.402]  | 0.230 [-0.293-0.725]          | -0.195 [-0.615-0.213]         | 0.001                   |
| Working<br>memory <sup>b,d</sup>     | -0.053 [-0.573-0.509] | 0.168 [-0.366-0.834]          | -0.165 [-0.664-0.269]         | 0.008                   |
| Executive<br>function <sup>b,e</sup> | 0.103 [-0.469-0.426]  | 0.248 [-0.334-0.614]          | -0.052 [-0.579-0.299]         | 0.013                   |

Data are median [interquartile range]. <sup>a</sup>Mann-Whitney U test. <sup>b</sup>All raw scores were z-standardized for better interpretation. Z-Scores of Trail Making Test were inverted. <sup>c</sup>Global cognition: Average z-score of Rey Complex Figure Test, Verbal Fluency, Trail Making-Test, Digit Span, Block Span, Letter-Number-Span. <sup>d</sup>Working Memory: Average z-score of Digit Span, Block Span, Letter-Number-Span, <sup>e</sup>Executive function: Average z-score of Verbal Fluency, Trail Making-Test B

**Supplemental Table S2 - Multiple linear regression models with cognitive domains as dependent variables**

| Effect                                   | Estimate | SE    | 95 % CI |        | P value |
|------------------------------------------|----------|-------|---------|--------|---------|
|                                          |          |       | LL      | UL     |         |
| Model 1: Global function <sup>a</sup>    |          |       |         |        |         |
| Intercept                                | 0.744    | 2.647 | -4.504  | 5.993  | 0.779   |
| mean SG <sup>b</sup>                     | -0.065   | 0.575 | -1.205  | 1.075  | 0.910   |
| Age                                      | -0.015   | 0.004 | -0.023  | -0.007 | 0.000   |
| Sex                                      | 0.110    | 0.119 | -0.127  | 0.347  | 0.359   |
| Education                                | 0.022    | 0.020 | -0.018  | 0.062  | 0.276   |
| Group                                    | -0.257   | 0.122 | -0.500  | -0.015 | 0.038   |
| Model 2: Working memory <sup>a</sup>     |          |       |         |        |         |
| Intercept                                | 2.003    | 3.176 | -4.295  | 8.302  | 0.529   |
| mean SG <sup>b</sup>                     | -0.317   | 0.690 | -1.685  | 1.051  | 0.647   |
| Age                                      | -0.015   | 0.005 | -0.025  | -0.005 | 0.004   |
| Sex                                      | 0.084    | 0.143 | -0.200  | 0.368  | 0.559   |
| Education                                | 0.017    | 0.024 | -0.031  | 0.065  | 0.491   |
| Group                                    | -0.289   | 0.147 | -0.580  | 0.002  | 0.052   |
| Model 3: Executive function <sup>a</sup> |          |       |         |        |         |
| Intercept                                | -3.763   | 3.320 | -10.346 | 2.820  | 0.260   |
| mean SG <sup>b</sup>                     | 0.842    | 0.721 | -0.588  | 2.271  | 0.246   |
| Age                                      | -0.012   | 0.005 | -0.022  | -0.001 | 0.027   |
| Sex                                      | 0.218    | 0.150 | -0.079  | 0.516  | 0.148   |
| Education                                | 0.032    | 0.025 | -0.0181 | 0.082  | 0.208   |
| Group                                    | -0.273   | 0.153 | -0.577  | 0.031  | 0.078   |

*N* = 110 (Insulin-sensitive = 57, Insulin-resistant = 53). *CV* coefficient of variation, *CI* confidence interval, *LL* lower limit, *UL* upper limit, *SE* standard error. Sex (0 = male, 1 = female); Group (0 = Insulin-sensitive, 1 = Insulin-resistant). <sup>a</sup>Scores were z-standardized for better interpretation. <sup>b</sup>Mean SG was log-transformed to correct right-skewed data.

**Supplemental Table S3 - Descriptive statistics of multilevel model parameters**

|                                  | All<br>(N = 103) | Insulin-sensitive<br>(n = 54) | Insulin-resistant<br>(n = 49) | P value <sup>a</sup> |
|----------------------------------|------------------|-------------------------------|-------------------------------|----------------------|
| Time points, n                   | 1.052            | 560                           | 492                           |                      |
| Trials, n                        | 10.21 ± 2.62     | 10.37 ± 2.67                  | 10.04 ± 2.59                  | 0.381                |
| <i>Level-1 predictors</i>        |                  |                               |                               |                      |
| mean SG, mg/dl                   | 94.74            | 91.63                         | 98.28                         | 0.000                |
| within individuals               | ± 14.76          | ± 13.09                       | ± 16.48                       |                      |
| between individuals              | ± 11.05          | ± 7.04                        | ± 13.47                       |                      |
| Glucose variability (CV), %      | 6.72             | 6.71                          | 6.72                          | 0.813                |
| within individuals               | ± 6.05           | ± 6.08                        | ± 5.96                        |                      |
| between individuals              | ± 3.56           | ± 3.30                        | ± 3.75                        |                      |
| working memory<br>performance, % | 86.43            | 88.95                         | 83.57                         | 0.000                |
| within individuals               | ± 13.29          | ± 11.61                       | ± 14.48                       |                      |
| between individuals              | ± 10.87          | ± 8.14                        | ± 12.55                       |                      |

Data are means ± SD or *n*. CV coefficient of variation, SG sensor glucose. <sup>a</sup>Mann-Whitney U test.

**Results of the ICC:**

The ICC was 0.40 for WM performance during EMA (adjudicating an amount of 60% within individual variance).

**Supplemental Table S4 - Sensitivity analysis on within-day level: Model estimates of the multilevel model with Level-1 predictor mean SG and glucose variability (CV) and dependent variable working memory**

| Effect                                 | Estimate | SE   | 95% CI |       |
|----------------------------------------|----------|------|--------|-------|
|                                        |          |      | LL     | UL    |
| Model 1 – mean SG                      |          |      |        |       |
| <i>Fixed effects</i>                   |          |      |        |       |
| Intercept                              | 1.83     | 0.12 | 1.58   | 2.07  |
| Mean SG <sup>a</sup>                   | 0.00     | 0.00 | –0.00  | 0.00  |
| Trial Number                           | 0.02     | 0.01 | 0.01   | 0.04  |
| Concentration <sup>b</sup>             | 0.01     | 0.00 | 0.01   | 0.02  |
| HOMA-IR <sup>c</sup>                   | –0.21    | 0.10 | –0.41  | –0.00 |
| Age                                    | –0.01    | 0.01 | –0.02  | –0.00 |
| Sex                                    | 0.11     | 0.16 | –0.20  | 0.43  |
| Education                              | 0.03     | 0.03 | –0.03  | 0.08  |
| <i>Random effects</i>                  |          |      |        |       |
| SD (Intercept)                         | 0.70     | 0.07 | 0.57   | 0.84  |
| SD (Mean SG <sup>a</sup> )             | 0.00     | 0.00 | 0.00   | 0.01  |
| SD (Trial Number)                      | 0.02     | 0.01 | 0.00   | 0.04  |
| SD (Concentration <sup>b</sup> )       | 0.01     | 0.00 | 0.00   | 0.01  |
| Model 2 – Glucose variability (CV)     |          |      |        |       |
| <i>Fixed effects</i>                   |          |      |        |       |
| Intercept                              | 1.82     | 0.13 | 1.55   | 2.07  |
| Glucose variability <sup>d</sup>       | –0.00    | 0.00 | –0.01  | 0.01  |
| Trial Number                           | 0.02     | 0.01 | 0.00   | 0.04  |
| Concentration <sup>b</sup>             | 0.01     | 0.00 | 0.01   | 0.02  |
| HOMA-IR <sup>c</sup>                   | –0.21    | 0.11 | –0.42  | 0.00  |
| Age                                    | –0.01    | 0.01 | –0.02  | –0.00 |
| Sex                                    | 0.12     | 0.16 | –0.19  | 0.44  |
| Education                              | 0.03     | 0.03 | –0.03  | 0.08  |
| <i>Random effects</i>                  |          |      |        |       |
| SD (intercept)                         | 0.72     | 0.08 | 0.58   | 0.88  |
| SD (Glucose variability <sup>d</sup> ) | 0.01     | 0.01 | 0.00   | 0.02  |
| SD (Trial Number)                      | 0.02     | 0.01 | 0.00   | 0.04  |
| SD (Concentration <sup>b</sup> )       | 0.01     | 0.00 | 0.00   | 0.01  |

*N* = 90. CGM continuous glucose monitoring parameter (Model 1. mean SG; Model 2. CV), CV coefficient of variation, CI confidence interval, SE standard error, SG sensor glucose, LL lower limit, UL upper limit, HOMA-IR homeostasis model assessment of insulin resistance, Sex (0 = male, 1 = female). <sup>a</sup>mean SG was log-transformed to correct right-skewed data. <sup>b</sup>Self-reported item. <sup>c</sup>HOMA-IR was log transformed to correct right-skewed data. <sup>d</sup>Glucose variability is measured by the coefficient of variation (CV) which was log-transformed to correct right-skewed data. Estimates of the two multilevel models are presented as log-odds. The inverse logit function (e.g., R function plogis) was used to convert the log-odds to proportion of correct responses (WM performance) for data interpretation.
